# Supplementary material for: Diagnostic Support for Selected Paediatric Pulmonary Diseases Using Answer-Pattern Recognition in Questionnaires Based on Combined Data Mining Applications—A Monocentric Observational Pilot Study
Source: PubMed Central journal article supplement (PMC4534438; doi:10.1371/journal.pone.0135180), 2015-08-12
Supplement: pone.0135180.s001.pdf [file pone.0135180.s001.pdf]

## Eltern wissen mehr!

- Welche Beobachtungen haben Sie gemacht? -

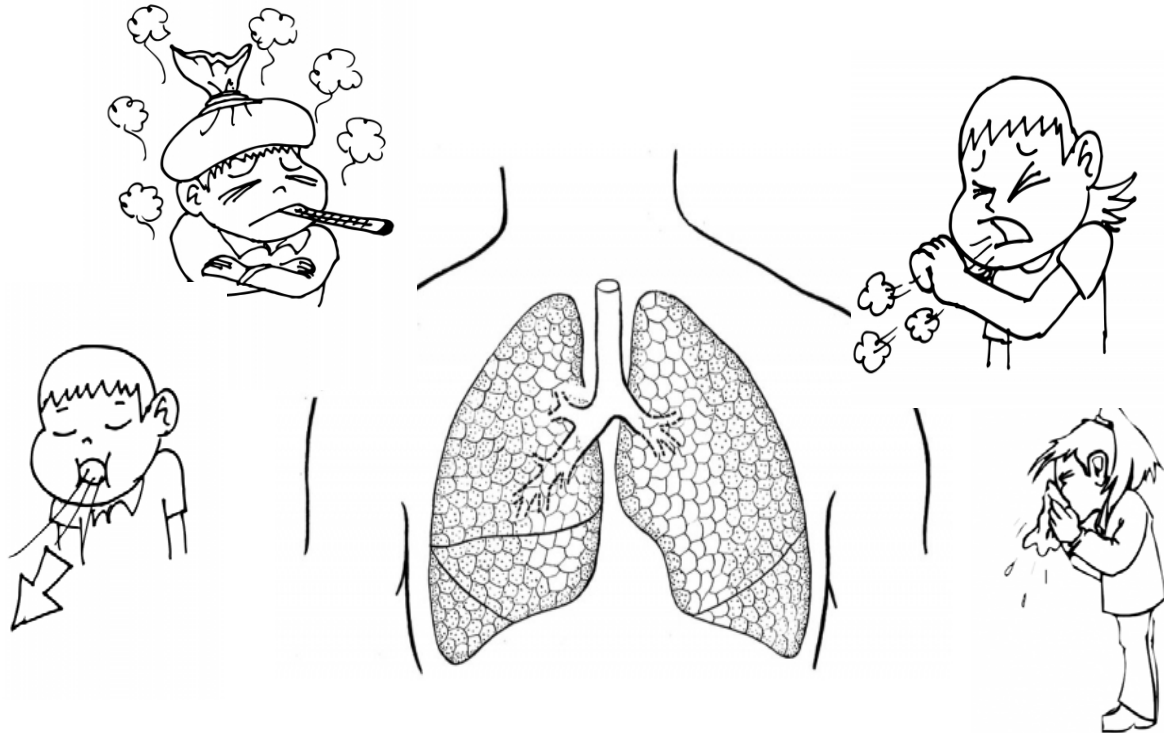

Eine Umfrage der

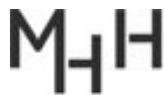

Medizinische Hochschule  
Hannover

zum Pilotprojekt:

**DaMiPu**

**Fragebogenbasierte und Data-Mining gestützte Diagnostik ausgewählter  
pulmonaler Erkrankungen bei Kindern**

**(2012)**

Medizinische Hochschule Hannover  
Carl-Neuberg-Straße 1  
30625 Hannover

Ihre Ansprechpartner:

PD Dr. Lorenz Grigull  
Ann-Katrin Rother  
Dr. Nicolaus Schwerk  
Dr. Folke Brinkmann

Tel. 0511-532-3221  
Tel. 0170/2839719  
Tel. 0511-532-3221  
Tel. 0511-532-3221

Abteilungen für Päd. Pneumologie sowie Päd. Hämatologie und Onkologie

**DaMiPu: Fragebogenbasierte und Data-Mining gestützte Diagnostik ausgewählter pulmonaler  
Erkrankungen bei Kindern (2012)**

Liebe Eltern,

Hannover, im Juni 2012

wir arbeiten an einem Projekt, mit Hilfe von Fragebögen die Diagnostik von ausgewählten Lungenerkrankungen bei Kindern zu unterstützen. Hierzu haben wir im vergangenen Jahr Interviews mit Eltern von Kindern mit verschiedenen Lungenerkrankungen durchgeführt, denn wir wollen so das Erfahrungswissen der Eltern besser nutzbar machen. Daraus ist der beiliegende Fragenkatalog entstanden. Nun brauchen wir ***Ihre Hilfe*** und ***Ihr Erfahrungswissen***.

Wir möchten Sie höflich bitten, sich ein paar Minuten für das Ausfüllen des Fragebogens zu nehmen. Bitte erinnern Sie sich hierzu an die Zeit, **bevor** die Beschwerden Ihres Kindes einen Namen (eine „Diagnose“) hatten. Kreuzen Sie einfach auf dem Fragebogen an, was *am besten* auf Ihr Kind in der Zeit **vor der Diagnose zutraf**. Hat Ihr Kind momentan das erste Mal Beschwerden, beziehen Sie sich bitte auf die letzten Tage und Wochen. Unser Ziel ist es, mit Hilfe Ihrer Antworten die Diagnostik zukünftig unterstützen zu können. Alle Angaben sind natürlich ***komplett anonymisiert*** und werden nur für das geschilderte Projekt verwendet. Bitte vergessen Sie nicht, Alter und Diagnose Ihres Kindes anzugeben. Sprechen Sie uns gerne bei Fragen oder Rückmeldungen an.

Vielen Dank für Ihre Mithilfe!

PD Dr. L. Grigull    Dr. N. Schwerk    Dr. F. Brinkmann    cand. med. A.-K. Rother

(Kontakt: Dr. L. Grigull; Email: grigull.lorenz@mh-hannover; Fon: 0511-532-3221)

### Fragebogen "DaMiPu"

**Ausfüllhinweise:** Bitte verwenden Sie einen blauen oder schwarzen Kugelschreiber oder einen Bleistift !

Markieren Sie so:      falsch:   Dieser Fragebogen wird maschinell erfasst. Bitte überschreiben Sie nicht die aufgedruckten Nummern oder die Eckmarkierungen auf den Seiten. Anmerkungen außerhalb der Anmerkungsfelder werden nicht erfasst.

Im Folgenden finden Sie eine Reihe von Fragen. Bitte antworten Sie, je nachdem ob Sie persönlich meinen, dass eine Feststellung eher "völlig zutrifft" oder eher "überhaupt nicht zutrifft" mit Angaben zwischen 1 (= trifft überhaupt nicht zu) und 6 (= trifft völlig zu). Sie können dabei gar nichts falsch machen, denn es gibt keine für jede Person zutreffenden Antworten. Antworten Sie bitte aufrichtig und ohne lange zu überlegen; lassen Sie bitte keine Antworten aus. Die Untersuchung dient allein wissenschaftlichen Forschungszwecken. Der Datenschutz ist gewährleistet; geben Sie bitte ihren Namen nicht an, sondern machen Sie bitte lediglich die Angaben zum betroffenen Kind!

Geschlecht Ihres Kindes:  Junge  Mädchen

Alter Ihres Kindes heute?  Jahre

Alter Ihres Kindes bei Auftreten der ersten Symptome?  Jahre

Alter Ihres Kindes bei Stellung der Diagnose?  Jahre

Welche Diagnose wurde bei Ihrem Kind gestellt?

|                                                                                                                                                                                                                                               | trifft überhaupt<br>nicht zu | 1                        | 2                        | 3                        | 4                        | 5                        | 6                        | trifft völlig<br>zu      |
|-----------------------------------------------------------------------------------------------------------------------------------------------------------------------------------------------------------------------------------------------|------------------------------|--------------------------|--------------------------|--------------------------|--------------------------|--------------------------|--------------------------|--------------------------|
| 1) <b>Schnarcht</b> Ihr Kind?                                                                                                                                                                                                                 | <input type="checkbox"/>     | <input type="checkbox"/> | <input type="checkbox"/> | <input type="checkbox"/> | <input type="checkbox"/> | <input type="checkbox"/> | <input type="checkbox"/> | <input type="checkbox"/> |
| 2) Leidet Ihr Kind manchmal unter <b>Luftnot</b> ?                                                                                                                                                                                            | <input type="checkbox"/>     | <input type="checkbox"/> | <input type="checkbox"/> | <input type="checkbox"/> | <input type="checkbox"/> | <input type="checkbox"/> | <input type="checkbox"/> | <input type="checkbox"/> |
| 3) Kann man sagen, dass Ihr Kind <b>stark verschleimt</b> ist?                                                                                                                                                                                | <input type="checkbox"/>     | <input type="checkbox"/> | <input type="checkbox"/> | <input type="checkbox"/> | <input type="checkbox"/> | <input type="checkbox"/> | <input type="checkbox"/> | <input type="checkbox"/> |
| 4) Hat bzw. hatte Ihr Kind einen <b>trockenen</b> Husten?                                                                                                                                                                                     | <input type="checkbox"/>     | <input type="checkbox"/> | <input type="checkbox"/> | <input type="checkbox"/> | <input type="checkbox"/> | <input type="checkbox"/> | <input type="checkbox"/> | <input type="checkbox"/> |
| 5) Gibt es auch Zeiten ohne Atembeschwerden bei Ihrem Kind?                                                                                                                                                                                   | <input type="checkbox"/>     | <input type="checkbox"/> | <input type="checkbox"/> | <input type="checkbox"/> | <input type="checkbox"/> | <input type="checkbox"/> | <input type="checkbox"/> | <input type="checkbox"/> |
| 6) Haben Sie das Gefühl, Sie bekommen Ihr Kind nicht mehr <b>hustenfrei</b> ?                                                                                                                                                                 | <input type="checkbox"/>     | <input type="checkbox"/> | <input type="checkbox"/> | <input type="checkbox"/> | <input type="checkbox"/> | <input type="checkbox"/> | <input type="checkbox"/> | <input type="checkbox"/> |
| 7) Besteht bzw. bestand während einer Erkältung auch <b>verstärkt Luftnot</b> ?                                                                                                                                                               | <input type="checkbox"/>     | <input type="checkbox"/> | <input type="checkbox"/> | <input type="checkbox"/> | <input type="checkbox"/> | <input type="checkbox"/> | <input type="checkbox"/> | <input type="checkbox"/> |
| 8) Trifft es zu, dass Ihrem Kind schneller als früher " <b>die Puste</b> " <b>ausgeht</b> (bei Aktivitäten, die es normalerweise stundenlang ausüben kann oder konnte, z.B. Spielen auf dem Spielplatz, Toben mit Freunden, Sportunterricht)? | <input type="checkbox"/>     | <input type="checkbox"/> | <input type="checkbox"/> | <input type="checkbox"/> | <input type="checkbox"/> | <input type="checkbox"/> | <input type="checkbox"/> | <input type="checkbox"/> |
| 9) Tritt bzw. trat <b>Husten</b> bevorzugt nach großer Anstrengung auf (z. B. Sport, wildes Toben, lange Fahrradtour)?                                                                                                                        | <input type="checkbox"/>     | <input type="checkbox"/> | <input type="checkbox"/> | <input type="checkbox"/> | <input type="checkbox"/> | <input type="checkbox"/> | <input type="checkbox"/> | <input type="checkbox"/> |
| 10) Hatte Ihr Kind bereits eine <b>Lungenentzündung</b> ?                                                                                                                                                                                     | <input type="checkbox"/>     | <input type="checkbox"/> | <input type="checkbox"/> | <input type="checkbox"/> | <input type="checkbox"/> | <input type="checkbox"/> | <input type="checkbox"/> | <input type="checkbox"/> |
| 11) Hatte Ihr Kind bereits eine Lungenentzündung und war während dessen trotzdem munter und fröhlich?                                                                                                                                         | <input type="checkbox"/>     | <input type="checkbox"/> | <input type="checkbox"/> | <input type="checkbox"/> | <input type="checkbox"/> | <input type="checkbox"/> | <input type="checkbox"/> | <input type="checkbox"/> |
| 12) Hatte Ihr Kind bereits eine Lungenentzündung, und nach dem Absetzen des Antibiotikums <b>folgte gleich die nächste Lungenentzündung</b> ?                                                                                                 | <input type="checkbox"/>     | <input type="checkbox"/> | <input type="checkbox"/> | <input type="checkbox"/> | <input type="checkbox"/> | <input type="checkbox"/> | <input type="checkbox"/> | <input type="checkbox"/> |
| 13) War Ihr Kind wegen Problemen mit der Lunge bereits im ersten Lebensjahr <b>häufiger krank</b> ?                                                                                                                                           | <input type="checkbox"/>     | <input type="checkbox"/> | <input type="checkbox"/> | <input type="checkbox"/> | <input type="checkbox"/> | <input type="checkbox"/> | <input type="checkbox"/> | <input type="checkbox"/> |
| 14) Leidet oder litt ihr Kind unter <b>Neurodermitis</b> (krankhaftes Hautjucken)?                                                                                                                                                            | <input type="checkbox"/>     | <input type="checkbox"/> | <input type="checkbox"/> | <input type="checkbox"/> | <input type="checkbox"/> | <input type="checkbox"/> | <input type="checkbox"/> | <input type="checkbox"/> |
| 15) Schläft bzw. schlief Ihr Kind schlecht, weil es ständig husten muss/musste?                                                                                                                                                               | <input type="checkbox"/>     | <input type="checkbox"/> | <input type="checkbox"/> | <input type="checkbox"/> | <input type="checkbox"/> | <input type="checkbox"/> | <input type="checkbox"/> | <input type="checkbox"/> |
| 16) Kündigen sich Anfälle von Atemnot mit einer " <b>käsigen oder komischen</b> " <b>Gesichtsfarbe</b> an?                                                                                                                                    | <input type="checkbox"/>     | <input type="checkbox"/> | <input type="checkbox"/> | <input type="checkbox"/> | <input type="checkbox"/> | <input type="checkbox"/> | <input type="checkbox"/> | <input type="checkbox"/> |
| 17) Würden Sie sagen, dass man den Husten Ihres Kindes als <b>feststehend</b> beschreiben kann/konnte?                                                                                                                                        | <input type="checkbox"/>     | <input type="checkbox"/> | <input type="checkbox"/> | <input type="checkbox"/> | <input type="checkbox"/> | <input type="checkbox"/> | <input type="checkbox"/> | <input type="checkbox"/> |

Bitte wenden!

|                                                                                                                                                                                      | trifft überhaupt<br>nicht zu | 1                        | 2                        | 3                        | 4                        | 5                        | 6                        | trifft völlig<br>zu |
|--------------------------------------------------------------------------------------------------------------------------------------------------------------------------------------|------------------------------|--------------------------|--------------------------|--------------------------|--------------------------|--------------------------|--------------------------|---------------------|
| 18) Finden oder fanden Sie ihr Kind auffallend <b>schlapp und/oder abgeschlagen (müde)</b> ?                                                                                         | <input type="checkbox"/>     | <input type="checkbox"/> | <input type="checkbox"/> | <input type="checkbox"/> | <input type="checkbox"/> | <input type="checkbox"/> | <input type="checkbox"/> |                     |
| 19) Geht bzw. ging auftretende <b>Luftnot</b> , auch ohne Medikamente, nach <b>einer kurzen Erholungsphase</b> von alleine wieder weg?                                               | <input type="checkbox"/>     | <input type="checkbox"/> | <input type="checkbox"/> | <input type="checkbox"/> | <input type="checkbox"/> | <input type="checkbox"/> | <input type="checkbox"/> |                     |
| 20) Würden Sie sagen, dass Ihr Kind ein eher <b>schlechter Esser</b> ist?                                                                                                            | <input type="checkbox"/>     | <input type="checkbox"/> | <input type="checkbox"/> | <input type="checkbox"/> | <input type="checkbox"/> | <input type="checkbox"/> | <input type="checkbox"/> |                     |
| 21) Hat bzw. hatte Ihr Kind bei Lungen- oder <b>Atemwegsproblemen</b> auch <b>Fieber</b> ?                                                                                           | <input type="checkbox"/>     | <input type="checkbox"/> | <input type="checkbox"/> | <input type="checkbox"/> | <input type="checkbox"/> | <input type="checkbox"/> | <input type="checkbox"/> |                     |
| 22) Hatte Ihr Kind zunächst <b>Schnupfen</b> und im weiteren Verlauf kam <b>Husten</b> dazu?                                                                                         | <input type="checkbox"/>     | <input type="checkbox"/> | <input type="checkbox"/> | <input type="checkbox"/> | <input type="checkbox"/> | <input type="checkbox"/> | <input type="checkbox"/> |                     |
| 23) Würden Sie ihr Kind als <b>infektanfällig</b> bezeichnen?                                                                                                                        | <input type="checkbox"/>     | <input type="checkbox"/> | <input type="checkbox"/> | <input type="checkbox"/> | <input type="checkbox"/> | <input type="checkbox"/> | <input type="checkbox"/> |                     |
| 24) Kommt bzw. kam es bei <b>Wetterumschwüngen</b> zu Atemnotanfällen?                                                                                                               | <input type="checkbox"/>     | <input type="checkbox"/> | <input type="checkbox"/> | <input type="checkbox"/> | <input type="checkbox"/> | <input type="checkbox"/> | <input type="checkbox"/> |                     |
| 25) Tritt oder trat der Husten Ihres Kindes <b>anfallsartig</b> auf?                                                                                                                 | <input type="checkbox"/>     | <input type="checkbox"/> | <input type="checkbox"/> | <input type="checkbox"/> | <input type="checkbox"/> | <input type="checkbox"/> | <input type="checkbox"/> |                     |
| 26) Hustet Ihr Kind gewissermaßen <b>von Geburt an</b> durchgehend?                                                                                                                  | <input type="checkbox"/>     | <input type="checkbox"/> | <input type="checkbox"/> | <input type="checkbox"/> | <input type="checkbox"/> | <input type="checkbox"/> | <input type="checkbox"/> |                     |
| 27) Finden Sie, dass Ihr Kind <b>öfter</b> unter Mittelohrentzündungen leidet bzw. litt?                                                                                             | <input type="checkbox"/>     | <input type="checkbox"/> | <input type="checkbox"/> | <input type="checkbox"/> | <input type="checkbox"/> | <input type="checkbox"/> | <input type="checkbox"/> |                     |
| 28) <b>Atmet</b> Ihr Kind eher <b>durch den Mund</b> ?                                                                                                                               | <input type="checkbox"/>     | <input type="checkbox"/> | <input type="checkbox"/> | <input type="checkbox"/> | <input type="checkbox"/> | <input type="checkbox"/> | <input type="checkbox"/> |                     |
| 29) Hatte Ihr Kind sofort nach der <b>Geburt Luftnot</b> ?                                                                                                                           | <input type="checkbox"/>     | <input type="checkbox"/> | <input type="checkbox"/> | <input type="checkbox"/> | <input type="checkbox"/> | <input type="checkbox"/> | <input type="checkbox"/> |                     |
| 30) Bestand bereits im ersten Lebensmonat nach der Geburt ein <b>Darmproblem</b> (z.B. erhebliche Verstopfung, Operation, Darmverschluss)?                                           | <input type="checkbox"/>     | <input type="checkbox"/> | <input type="checkbox"/> | <input type="checkbox"/> | <input type="checkbox"/> | <input type="checkbox"/> | <input type="checkbox"/> |                     |
| 31) Sind bei Ihrem Kind <b>Allergien</b> festgestellt worden?                                                                                                                        | <input type="checkbox"/>     | <input type="checkbox"/> | <input type="checkbox"/> | <input type="checkbox"/> | <input type="checkbox"/> | <input type="checkbox"/> | <input type="checkbox"/> |                     |
| 32) Wurden bei Ihrem Kind bereits die " <b>Mandeln</b> " und/oder " <b>Polypen</b> " entfernt?                                                                                       | <input type="checkbox"/>     | <input type="checkbox"/> | <input type="checkbox"/> | <input type="checkbox"/> | <input type="checkbox"/> | <input type="checkbox"/> | <input type="checkbox"/> |                     |
| 33) Kann man sagen, dass Ihr Kind auffallend häufig <b>Durchfall</b> hat?                                                                                                            | <input type="checkbox"/>     | <input type="checkbox"/> | <input type="checkbox"/> | <input type="checkbox"/> | <input type="checkbox"/> | <input type="checkbox"/> | <input type="checkbox"/> |                     |
| 34) Liegt bei Ihrem Kind ein <b>jahreszeitenunabhängiger "Dauerschnupfen"</b> vor?                                                                                                   | <input type="checkbox"/>     | <input type="checkbox"/> | <input type="checkbox"/> | <input type="checkbox"/> | <input type="checkbox"/> | <input type="checkbox"/> | <input type="checkbox"/> |                     |
| 35) Finden Sie, dass Ihr Kind <b>im Vergleich zu Gleichaltrigen</b> besonders häufig <b>Atemprobleme</b> hat und vielleicht daher auch häufiger im Kindergarten/in der Schule fehlt? | <input type="checkbox"/>     | <input type="checkbox"/> | <input type="checkbox"/> | <input type="checkbox"/> | <input type="checkbox"/> | <input type="checkbox"/> | <input type="checkbox"/> |                     |
| 36) Haben bzw. hatten Sie das Gefühl, Ihr Kind ist/war in der <b>Entwicklung seiner Bewegungen</b> (z. B. spätes Laufen lernen) langsamer als seine Altersgenossen?                  | <input type="checkbox"/>     | <input type="checkbox"/> | <input type="checkbox"/> | <input type="checkbox"/> | <input type="checkbox"/> | <input type="checkbox"/> | <input type="checkbox"/> |                     |
| 37) Gibt es <b>Verwandte</b> mit einer chronischen Lungenerkrankung (z.B. Asthma, Mukoviszidose, Primäre Ciliäre Dyskinesie, Chronische Bronchitis oder ähnliches)?                  | <input type="checkbox"/>     | <input type="checkbox"/> | <input type="checkbox"/> | <input type="checkbox"/> | <input type="checkbox"/> | <input type="checkbox"/> | <input type="checkbox"/> |                     |
| 38) Trifft es zu, dass <b>Infekte</b> bei Ihrem Kind <b>nicht richtig weggehen</b> , dass beispielsweise erst die Ohren, dann die Lungen usw. immer wieder betroffen sind?           | <input type="checkbox"/>     | <input type="checkbox"/> | <input type="checkbox"/> | <input type="checkbox"/> | <input type="checkbox"/> | <input type="checkbox"/> | <input type="checkbox"/> |                     |
| 39) Haben bzw. hatten Sie schon länger "irgendwie" das Gefühl, dass mit Ihrem Kind <b>etwas nicht stimmt</b> ?                                                                       | <input type="checkbox"/>     | <input type="checkbox"/> | <input type="checkbox"/> | <input type="checkbox"/> | <input type="checkbox"/> | <input type="checkbox"/> | <input type="checkbox"/> |                     |
| 40) Bestehen bzw. bestanden während der Haupt- <b>Pollenflugzeit</b> (März bis September) Atemprobleme?                                                                              | <input type="checkbox"/>     | <input type="checkbox"/> | <input type="checkbox"/> | <input type="checkbox"/> | <input type="checkbox"/> | <input type="checkbox"/> | <input type="checkbox"/> |                     |
| 41) Musste Ihr Kind bereits an der <b>Lunge operiert</b> werden?                                                                                                                     | <input type="checkbox"/>     | <input type="checkbox"/> | <input type="checkbox"/> | <input type="checkbox"/> | <input type="checkbox"/> | <input type="checkbox"/> | <input type="checkbox"/> |                     |
| 42) Haben/Hatten Sie den Eindruck, dass man bei Ihrem Kind beim Atmen manchmal " <b>rasselnde Atemgeräusche</b> " hört/hörte?                                                        | <input type="checkbox"/>     | <input type="checkbox"/> | <input type="checkbox"/> | <input type="checkbox"/> | <input type="checkbox"/> | <input type="checkbox"/> | <input type="checkbox"/> |                     |
| 43) Hören Sie ein <b>Pfeifen</b> , wenn Ihr Kind atmet?                                                                                                                              | <input type="checkbox"/>     | <input type="checkbox"/> | <input type="checkbox"/> | <input type="checkbox"/> | <input type="checkbox"/> | <input type="checkbox"/> | <input type="checkbox"/> |                     |
| 44) <b>Wechseln</b> bzw. wechselten sich Tage mit <b>Schlappeheit</b> und Tage mit <b>gutem Befinden</b> ab?                                                                         | <input type="checkbox"/>     | <input type="checkbox"/> | <input type="checkbox"/> | <input type="checkbox"/> | <input type="checkbox"/> | <input type="checkbox"/> | <input type="checkbox"/> |                     |
| 45) Gibt bzw. gab es Tage an denen Ihr Kind sehr stark hustet/hustete, die von Tagen <b>mit völliger Beschwerdefreiheit</b> abgelöst werden/wurden?                                  | <input type="checkbox"/>     | <input type="checkbox"/> | <input type="checkbox"/> | <input type="checkbox"/> | <input type="checkbox"/> | <input type="checkbox"/> | <input type="checkbox"/> |                     |

Herzlichen Dank für Ihre Zeit und die Beantwortung der Fragen!
