# Supplementary material for: Diagnostic Support for Selected Paediatric Pulmonary Diseases Using Answer-Pattern Recognition in Questionnaires Based on Combined Data Mining Applications—A Monocentric Observational Pilot Study
Source: PLoS One. 2015 Aug 12;10(8):e0135180. doi: 10.1371/journal.pone.0135180 (PMC4534438; doi:10.1371/journal.pone.0135180)
Supplement: S1 Table — (XLSX) [file pone.0135180.s003.xlsx]

## Sheet: wbk99B
Pulmo_RawDataset.txt
age	question_1	question_2	question_3	question_4	question_5	question_6	question_7	question_8	question_9	question_10	question_11	question_12	question_13	question_14	question_15	question_16	question_17	question_18	question_19	question_20	question_21	question_22	question_23	question_24	question_25	question_26	question_27	question_28	question_29	question_30	question_31	question_32	question_33	question_34	question_35	question_36	question_37	question_38	question_39	question_40	question_41	question_42	question_43	question_44	question_45	diagnoses
6	5	4	3	3	6	1	5	5	4	6	4	1	3	1	1	1	3	4	1	1	3	6	6	4	4	2	1	1	1	1	6	3	1	1	6	1	1	1	3	2	2	6	4	5	5	2
7	1	2	4	6	6	5	3	1	5	1	1	1	6	6	5	1	6	1	1	3	3	1	6	6	5	5	1	4	1	1	6	1	3	1	1	1	1	4	6	5	5	3	2	1	1	2
7	2	5	4	2	6	4	6	5	4	6	1	1	3	3	4	1	5	4	3	1	6	6	6	5	3	5	4	3	1	1	5	6	2	3	6	1	2	5	5	4	1	5	5	5	4	2
14	1	6	1	5	6	1	5	4	5	1	1	1	1	6	5	1	6	5	1	6	1	6	6	6	6	1	1	5	1	1	6	1	6	4	6	5	1	2	3	6	1	6	6	6	6	2
12	1	3	1	4	6	4	6	3	3	6	1	1	6	6	6	5	4	5	2	5	4	3	4	6	6	5	1	1	1	1	6	1	1	1	5	4	6	5	6	6	1	5	1	3	2	2
11	4	6	2	6	6	1	6	6	5	1	1	1	4	6	5	1	6	5	2	2	1	4	4	4	1	1	5	1	1	1	6	1	4	1	1	1	1	4	6	6	1	5	5	4	4	2
10	3	3	1	1	6	1	6	6	3	1	1	1	1	6	1	6	3	6	1	1	1	6	3	6	3	1	1	6	1	1	6	1	1	1	6	1	6	3	1	6	1	6	6	1	1	2
6	5	4	5	6	4	5	5	5	5	6	3	1	6	1	3	4	5	5	2	1	3	6	6	5	5	4	5	5	1	1	1	6	1	2	3	1	6	4	5	3	1	5	5	4	5	2
11	4	2	2	3	6	4	5	4	1	6	5	2	1	1	1	1	4	2	2	1	6	6	6	2	5	1	1	2	1	1	6	6	1	4	6	1	6	4	4	1	1	4	4	2	2	2
6	5	4	5	5	6	6	5	4	6	6	4	2	2	2	5	3	6	4	2	1	3	6	6	2	6	3	1	6	1	1	6	6	2	4	6	1	1	6	6	6	1	6	6	6	3	2
13	1	4	4	5	5	6	6	4	4	6	6	1	1	6	4	1	3	5	4	1	5	6	6	1	1	1	1	6	1	1	6	1	1	5	6	1	1	5	1	1	1	6	6	5	3	2
14	3	2	1	1	6	1	1	5	1	1	1	1	1	6	1	1	1	4	5	1	1	6	1	1	1	1	1	6	1	1	6	6	1	1	1	1	6	1	1	1	1	6	5	4	1	2
7	6	5	5	3	6	2	6	6	5	6	6	6	6	6	4	5	4	5	2	3	2	1	4	5	3	2	6	5	3	1	6	6	2	2	2	2	6	3	1	6	1	6	6	2	3	2
8	4	4	2	6	4	5	3	5	4	1	1	1	1	1	3	2	3	3	4	2	2	2	3	2	5	2	3	3	1	1	1	6	1	1	5	1	1	1	3	2	1	4	4	3	3	2
13	1	3	1	3	5	1	1	6	6	6	3	6	6	1	3	5	1	5	1	1	1	5	5	4	1	1	5	6	1	1	6	6	1	1	6	1	1	4	1	6	1	4	5	4	5	2
12	2	1	4	4	6	4	2	6	4	6	2	4	6	1	5	1	5	2	6	2	5	5	2	1	2	4	1	5	6	1	1	1	5	4	2	4	1	3	4	1	1	5	4	1	3	1
12	2	1	3	5	6	4	1	1	4	1	1	1	2	1	4	1	5	1	6	5	1	1	1	1	5	1	1	6	4	1	1	6	2	1	1	1	6	1	3	1	1	2	4	1	3	1
7	2	1	2	1	3	5	1	1	2	6	6	1	1	1	2	1	2	2	6	3	3	3	6	1	2	1	1	2	1	1	1	1	1	1	3	6	1	5	5	1	1	2	2	3	1	6
14	4	4	3	5	2	1	5	2	3	1	1	1	5	1	3	1	1	1	2	1	1	1	2	5	2	2	1	2	1	1	6	6	1	1	6	1	1	1	6	1	1	6	5	4	1	2
10	4	2	3	4	2	2	4	6	4	6	1	1	5	2	3	2	3	5	4	5	4	4	6	2	4	3	1	5	1	1	3	6	4	2	5	2	1	4	6	2	1	4	4	5	3	1
8	5	2	1	4	6	1	1	1	4	1	1	1	1	1	1	1	1	1	6	1	1	3	1	1	1	1	1	6	1	1	2	6	1	1	1	1	1	1	6	1	1	2	1	1	1	1
5	1	1	1	1	6	1	1	1	1	1	1	1	1	1	1	1	1	1	6	1	1	3	4	1	1	1	1	1	1	1	1	1	1	3	3	1	1	3	2	1	1	1	1	1	1	1
7	1	1	1	1	1	1	1	3	1	1	1	1	3	1	1	1	1	1	1	1	1	3	1	1	1	1	1	1	1	6	1	1	1	1	1	1	1	1	1	1	1	1	1	1	3	1
11	3	3	2	5	6	1	2	3	6	1	1	1	2	1	2	1	5	2	1	4	5	6	4	1	2	1	1	6	1	6	1	1	5	1	2	2	1	1	1	1	1	5	4	6	1	1
11	6	2	1	6	6	1	1	1	1	6	4	2	6	1	2	1	3	4	6	6	4	5	2	1	1	2	1	6	3	1	1	6	6	2	1	1	6	1	1	1	1	3	1	5	6	1
16	1	1	1	1	1	1	1	1	1	1	1	1	1	1	1	1	1	1	1	2	1	1	1	1	1	1	1	2	1	6	2	1	1	1	1	1	1	1	1	1	1	1	1	1	1	1
2	1	1	1	1	6	1	1	1	1	1	1	1	1	1	1	1	1	1	1	5	1	6	2	1	1	1	1	1	1	1	1	1	5	1	1	1	1	1	5	1	1	1	1	1	1	4
2	6	1	1	2	6	1	2	1	1	1	1	1	1	1	1	1	1	2	6	1	1	5	1	1	1	1	1	2	1	6	1	1	4	1	1	2	4	1	1	1	1	1	1	1	1	1
1	1	1	1	1	1	1	1	1	1	6	2	1	6	1	1	1	2	1	1	1	6	6	2	1	1	2	1	1	1	1	1	1	1	1	1	1	1	1	1	1	1	1	1	1	1	1
4	4	4	6	3	3	6	6	6	6	6	1	1	1	1	6	6	6	6	1	6	6	6	6	6	6	4	1	1	1	1	1	1	3	4	6	6	6	6	6	1	1	6	6	1	1	2
10	2	2	3	2	6	1	5	4	2	2	6	1	1	1	5	1	3	1	4	5	2	5	3	1	1	1	1	1	1	1	5	1	1	1	1	2	1	1	5	1	1	5	4	4	4	2
4	1	4	3	5	2	4	4	6	6	2	1	1	6	2	3	5	4	3	5	2	2	2	2	3	3	1	1	1	1	1	2	1	1	2	4	1	6	2	3	2	1	2	3	3	3	2
15	3	1	1	2	6	1	1	1	1	1	1	1	1	1	1	1	1	1	6	4	1	1	3	1	1	1	2	3	1	1	1	1	2	3	1	1	1	1	1	1	1	1	1	1	1	1
14	6	6	4	5	3	4	6	5	5	1	2	2	2	1	4	4	6	4	4	1	5	6	6	5	6	2	1	5	1	1	6	4	1	1	5	3	4	1	5	6	6	6	5	6	6	2
4	3	5	5	6	5	3	5	4	4	1	1	1	6	6	4	3	6	6	5	5	5	5	5	1	5	3	6	6	1	6	1	6	4	3	3	1	6	5	5	5	1	6	4	5	6	2
8	2	6	3	3	6	1	6	4	4	6	1	1	6	6	6	6	6	6	1	1	3	6	6	4	6	4	6	6	1	6	6	1	2	2	6	1	6	3	6	3	1	6	6	6	6	2
2	1	4	6	6	6	3	6	6	6	1	1	1	6	6	6	1	6	1	2	4	1	4	6	4	6	1	1	3	2	6	1	1	1	1	3	1	6	1	6	6	1	6	4	1	1	6
3	2	2	4	6	3	4	4	1	6	6	4	4	6	1	5	1	4	4	3	3	4	6	6	1	2	3	5	3	1	2	1	1	1	1	3	1	3	2	1	2	1	3	3	2	1	6
14	1	6	5	4	1	6	6	6	6	1	1	1	1	1	6	1	6	6	1	4	1	3	2	6	3	1	1	2	1	1	2	1	1	2	3	1	1	1	1	1	1	6	2	4	1	2
14	2	2	1	3	5	5	5	3	3	6	4	6	6	1	3	1	2	4	5	2	6	5	5	5	4	2	2	4	1	1	1	1	5	2	2	1	4	4	2	2	1	2	2	3	5	1
6	3	4	2	4	6	1	5	2	4	1	1	1	4	6	1	5	6	1	1	3	5	4	5	2	2	1	3	5	1	1	6	1	1	1	4	1	6	5	5	5	1	5	5	3	1	2
16	2	2	5	5	4	6	1	2	3	3	1	1	1	1	2	1	4	2	1	1	2	3	2	1	1	1	1	4	2	4	6	1	5	4	1	1	1	2	2	1	1	3	2	2	2	1
12	6	2	5	3	6	1	3	2	1	6	5	2	5	3	1	1	2	2	5	1	2	5	3	1	1	1	1	6	2	1	6	1	5	2	2	5	5	1	6	1	1	3	1	1	4	1
10	1	1	3	5	1	1	1	1	5	1	1	1	4	1	1	1	1	1	1	1	1	1	1	1	1	1	1	1	1	6	1	1	1	1	1	2	3	1	1	1	1	2	2	1	1	1
9	1	4	2	6	2	6	3	4	6	6	1	6	1	1	5	1	6	4	1	1	1	1	1	1	1	1	1	4	1	1	1	1	6	1	2	1	1	5	6	1	1	6	6	1	1	1
10	1	3	6	4	2	6	6	6	6	6	1	6	2	1	1	1	4	4	4	4	2	4	3	4	3	3	1	3	2	6	1	1	1	1	5	1	6	4	3	1	6	6	4	4	4	1
14	3	3	4	4	6	3	2	2	2	6	2	1	6	1	6	1	3	1	1	1	6	6	6	1	4	5	1	1	1	6	1	1	4	4	5	1	1	4	3	1	3	1	1	4	4	1
3	1	1	4	1	6	1	1	1	1	1	1	1	1	1	1	1	6	1	2	1	1	5	1	1	1	1	1	1	1	1	1	1	1	1	1	1	1	1	1	1	1	4	1	1	1	6
11	3	3	2	5	5	2	5	6	5	2	2	1	6	1	2	3	4	2	3	2	5	2	3	5	4	1	1	5	1	1	5	6	1	1	2	1	6	2	4	1	1	5	3	5	6	2
1	3	1	2	1	6	1	1	1	1	1	1	1	1	1	1	1	1	1	4	1	1	1	1	1	1	1	1	1	1	6	1	1	1	1	1	4	5	1	1	1	1	1	1	2	1	1
5	2	4	2	6	6	5	5	5	5	1	1	1	1	1	6	1	5	4	2	1	1	1	1	1	2	1	1	5	1	1	4	6	1	1	1	1	6	1	2	5	1	5	2	1	4	2
12	1	6	3	6	1	1	6	3	5	6	5	6	6	1	6	6	3	6	2	6	2	6	4	3	3	3	6	3	1	1	1	6	1	1	6	1	6	6	6	1	1	6	3	6	3	2
4	3	6	6	1	2	1	6	1	1	1	1	1	1	1	1	1	1	3	1	6	1	6	3	1	2	2	1	2	3	6	1	1	6	2	1	1	1	1	6	1	1	6	6	3	2	1
15	5	6	6	6	6	6	6	6	6	6	4	4	6	1	5	6	5	5	1	3	4	6	6	6	6	1	6	6	1	1	6	6	1	6	6	5	1	5	5	6	1	6	6	6	1	6
9	2	6	2	2	6	1	5	3	2	6	5	6	1	1	2	5	5	4	2	6	2	6	5	4	4	1	1	3	1	1	1	1	1	1	5	2	6	3	6	5	1	5	5	5	6	2
2	3	5	6	5	4	6	6	1	1	6	1	6	6	1	1	1	6	4	1	3	6	1	6	3	2	6	6	2	5	1	1	1	1	5	6	1	1	1	6	1	1	6	1	3	6	6
13	2	2	5	3	6	3	2	4	5	6	6	6	6	1	1	2	5	5	6	1	5	5	4	3	5	3	1	3	1	1	6	1	5	3	6	1	6	2	6	1	1	6	4	3	3	1
15	3	6	6	2	3	6	6	6	6	6	5	6	6	5	3	2	6	4	4	1	6	3	6	3	2	6	6	6	6	1	6	6	1	6	6	1	1	6	6	6	1	6	6	4	1	3
10	1	1	6	3	4	6	1	1	2	6	3	6	6	5	6	1	3	3	4	6	6	6	6	1	1	5	6	6	6	1	6	6	1	6	6	6	3	6	6	1	1	6	6	6	3	3
12	1	2	3	1	6	1	1	2	3	1	1	1	1	1	2	1	1	1	6	3	1	2	2	1	1	3	4	3	3	1	1	6	1	3	2	4	1	1	1	1	1	3	2	1	1	3
20	4	3	5	3	6	5	3	2	6	6	6	5	4	1	4	2	4	3	2	5	5	5	6	2	5	3	5	5	1	1	1	6	3	6	2	4	6	6	6	1	6	6	6	6	6	3
2	4	1	4	1	2	1	1	1	1	1	1	1	2	1	3	1	3	1	1	1	1	6	2	1	1	3	4	5	6	1	1	1	3	4	1	6	1	6	1	1	1	4	4	1	1	3
2	1	6	2	6	6	1	6	1	3	6	1	1	6	1	4	1	1	3	5	1	4	6	6	4	5	1	1	4	1	1	1	1	1	1	4	6	6	1	2	6	4	6	4	1	2	2
1	2	1	6	6	6	3	4	6	4	1	1	1	1	1	4	6	4	6	2	5	1	6	4	1	1	1	1	2	6	1	1	1	1	1	1	1	1	1	1	1	1	6	6	6	1	6
15	1	1	1	4	6	1	1	1	1	1	1	1	1	1	1	3	6	6	1	1	6	1	1	1	3	1	1	1	1	1	1	1	1	3	1	1	1	1	1	1	1	1	1	1	1	4
10	5	1	2	4	6	1	1	1	2	6	2	1	6	1	4	1	3	5	6	6	2	4	1	1	1	4	1	6	2	6	1	6	2	1	1	1	6	1	6	1	1	1	2	5	2	1
7	1	1	1	1	1	1	3	3	3	1	1	1	1	1	1	1	1	1	6	1	1	6	1	1	1	1	1	1	1	6	1	1	1	1	1	3	1	1	1	1	1	1	1	1	6	1
12	2	3	2	2	5	2	3	3	4	6	5	1	4	1	3	3	3	4	3	5	3	5	4	3	2	1	4	4	1	2	6	6	6	2	3	2	5	3	6	4	6	2	1	3	3	1
16	3	1	1	2	6	1	1	1	2	1	1	1	1	1	1	1	1	2	6	3	1	3	4	1	1	1	2	2	1	1	1	1	2	1	1	1	1	1	1	1	1	1	1	2	2	1
15	1	1	1	3	6	2	1	1	3	4	3	1	6	3	3	1	2	1	1	1	6	6	3	1	1	3	1	1	1	1	3	1	6	1	1	1	6	1	6	1	1	1	1	1	1	1
15	3	3	4	4	6	3	3	3	4	1	1	1	2	1	3	1	4	2	6	1	1	1	6	2	1	4	6	5	6	6	1	1	5	1	1	4	1	2	6	1	1	4	3	1	1	1
4	3	3	4	6	6	3	3	3	3	1	1	1	4	6	5	5	6	2	2	6	5	6	5	2	5	3	5	6	1	1	6	6	1	3	2	4	2	5	4	6	1	6	5	2	5	2
6	3	3	3	3	6	3	2	1	2	1	1	1	1	1	3	2	1	4	5	1	3	6	4	2	2	1	1	4	1	1	6	1	1	2	3	1	6	2	3	6	1	5	5	2	3	2
10	3	5	5	3	2	5	6	5	5	6	4	4	6	1	6	3	4	4	5	1	4	5	6	3	5	2	2	4	1	2	1	6	2	2	6	4	6	4	5	2	1	6	6	4	4	2
3	3	4	6	1	2	6	6	3	5	6	3	6	6	1	2	4	6	4	1	2	6	6	6	5	3	6	6	6	6	1	1	1	1	6	3	1	1	1	6	1	1	6	2	4	5	6
10	2	1	3	5	6	4	2	3	4	1	1	1	1	1	2	1	5	2	5	3	2	6	5	1	2	1	1	4	1	1	6	6	2	1	1	1	2	1	1	5	1	6	4	1	5	2
14	1	6	2	3	6	1	6	3	3	6	1	1	3	1	2	3	3	4	1	1	3	1	3	5	4	1	1	3	1	1	6	1	1	2	3	1	1	2	6	1	1	6	6	3	1	2
15	3	3	3	2	6	2	3	4	4	1	1	1	1	3	3	4	3	4	3	1	3	4	3	5	5	1	1	4	1	5	6	1	5	1	4	1	1	1	3	2	1	3	3	3	3	2
4	2	3	3	3	1	4	1	1	1	6	5	6	2	1	3	1	4	4	4	1	6	6	6	1	2	3	3	3	1	1	1	6	3	3	1	2	1	3	1	1	1	3	2	2	2	5
3	6	1	4	4	1	4	1	1	1	1	1	1	1	1	4	1	5	1	1	6	5	6	3	3	1	6	1	2	1	1	1	1	3	2	1	6	6	4	3	1	1	2	1	1	6	5
12	2	4	3	5	2	6	6	6	5	6	2	1	2	3	5	1	5	2	2	3	3	1	5	2	4	2	4	3	1	4	6	1	1	5	6	4	2	5	5	6	1	4	3	6	6	2
3	3	4	4	4	5	5	5	5	5	2	3	1	6	1	6	2	3	4	1	4	2	4	6	5	4	2	5	3	6	6	2	6	4	3	4	3	2	3	3	3	1	3	3	4	4	2
11	3	4	4	4	2	5	4	5	5	1	1	1	5	1	4	2	5	3	2	3	4	5	6	4	4	5	5	3	4	1	5	5	2	5	5	2	6	5	4	4	1	4	3	3	4	2
16	4	1	1	2	6	1	1	1	1	1	1	1	1	1	1	1	1	1	1	1	2	1	1	1	1	1	1	4	1	1	1	1	1	1	1	1	1	1	1	1	1	1	1	1	1	7
14	5	1	1	2	6	1	1	1	1	1	1	1	1	1	1	1	1	1	1	2	1	2	1	1	1	1	3	3	1	1	5	6	1	1	1	1	1	1	1	1	1	1	1	1	1	7
5	1	1	1	1	6	1	1	3	1	1	1	1	1	1	1	1	1	5	1	1	6	1	1	1	1	1	6	1	1	1	6	6	1	1	1	1	1	1	1	1	1	1	1	1	1	4
3	1	1	1	3	6	1	1	1	1	4	3	1	5	1	1	1	2	1	5	3	5	4	2	1	1	1	3	2	1	1	1	1	1	1	1	1	1	1	1	1	1	4	1	1	1	7
7	1	1	1	2	6	1	2	1	1	5	4	1	4	1	1	1	1	1	5	2	6	5	3	1	1	1	1	3	1	1	1	1	1	1	1	1	1	1	1	1	1	3	1	1	1	7
10	1	1	1	1	6	1	1	1	1	1	1	1	1	1	1	1	1	1	6	2	3	4	2	1	1	1	1	2	1	5	1	1	2	1	1	1	1	1	1	1	1	1	1	2	1	7
9	4	6	4	6	1	1	6	6	6	1	1	1	2	6	4	5	6	6	1	4	6	4	5	5	6	5	3	5	1	1	6	1	1	2	6	1	6	3	6	6	1	6	4	6	4	2
5	3	5	1	5	6	1	5	1	2	1	1	1	4	6	2	2	4	5	3	3	4	5	4	1	1	1	1	2	1	1	1	1	1	1	4	1	1	1	1	1	1	6	1	1	1	6
12	6	2	1	6	6	3	1	1	3	6	1	1	2	1	6	1	6	1	3	2	5	6	4	1	3	1	6	6	1	1	1	1	1	1	4	1	6	4	1	1	1	1	1	1	1	7
2	5	5	5	6	6	4	6	1	1	1	1	1	6	1	5	2	6	6	6	1	6	6	4	1	6	1	1	2	1	1	1	1	1	1	1	4	1	1	1	1	1	2	1	1	1	6
42	5	3	5	3	1	6	4	6	5	6	6	6	6	1	4	1	4	5	6	5	5	5	3	3	2	6	4	6	6	1	6	6	1	6	6	5	5	6	6	5	1	6	1	6	6	3
4	1	6	6	1	1	6	6	6	6	6	1	6	6	1	4	5	4	6	1	6	6	3	4	4	5	6	4	1	6	6	1	1	1	2	6	6	6	6	6	2	1	6	6	4	1	3
2	3	3	6	5	4	6	4	6	6	1	1	1	1	1	3	4	4	2	5	1	6	6	2	1	5	1	1	5	1	1	1	1	1	1	3	1	4	4	6	1	1	2	5	3	6	5
7	1	2	6	3	4	4	2	4	3	6	6	6	6	4	6	5	4	5	4	6	5	3	6	4	4	6	4	6	6	3	1	6	6	3	5	1	6	6	6	1	1	4	2	6	6	6
9	1	6	4	5	4	6	6	6	6	6	6	6	4	1	6	6	5	4	6	1	6	4	5	6	5	1	2	4	1	1	6	6	1	4	6	1	6	5	6	5	1	6	6	6	5	6
2	1	6	4	2	6	6	6	1	2	1	1	1	3	1	6	1	6	6	1	4	6	6	6	1	6	1	1	2	1	1	1	1	1	3	6	4	6	2	4	1	1	5	2	6	4	6
12	1	1	6	4	6	6	1	1	1	1	1	1	1	3	6	1	3	5	2	4	6	1	1	1	4	1	5	2	6	3	1	1	5	1	1	1	1	5	1	1	1	5	1	5	1	5
2	3	1	2	4	5	1	1	2	2	1	1	1	1	1	3	1	1	3	2	1	3	4	1	1	3	1	2	3	1	1	1	1	2	1	1	1	5	1	1	1	1	3	2	2	3	5
1	1	6	3	3	4	6	5	5	4	1	1	1	3	1	6	5	5	6	4	2	3	1	6	1	6	3	1	6	1	1	1	1	1	1	2	6	6	3	2	1	1	4	1	6	4	5
4	6	1	6	4	6	3	6	4	6	1	1	1	1	1	6	1	1	1	1	1	6	6	6	1	1	1	1	6	1	1	1	1	3	1	1	1	6	2	6	1	1	6	6	3	4	4
14	1	1	6	6	1	3	1	3	5	6	1	1	1	1	1	1	6	6	1	4	1	5	4	2	5	1	2	4	2	1	1	6	2	1	1	1	1	2	1	1	1	6	4	1	2	4
11	4	1	2	1	4	6	6	4	4	6	1	6	6	1	1	1	1	1	2	6	6	6	6	3	2	6	6	2	1	1	1	1	1	1	1	1	1	6	6	1	1	6	3	1	3	3
11	6	1	6	6	6	6	1	1	1	6	1	3	6	2	1	1	6	1	1	1	6	6	6	1	1	6	4	6	1	1	3	6	1	6	1	1	6	6	6	1	1	4	4	1	1	3
15	5	1	1	1	6	1	1	1	1	1	1	1	1	3	1	1	1	2	6	1	5	4	2	1	1	1	1	1	1	1	1	6	1	1	1	2	1	1	1	1	1	1	1	1	1	7
12	1	1	1	1	6	1	3	1	1	1	1	1	4	1	1	1	1	1	1	2	4	5	5	1	1	1	1	1	1	1	1	1	1	1	1	1	1	1	1	1	1	1	1	1	1	7
15	1	1	1	1	6	1	1	1	1	1	1	1	1	1	1	1	1	1	5	2	3	5	1	1	1	1	1	1	1	1	1	1	3	1	1	1	2	1	1	1	1	1	1	1	1	7
2	2	6	2	5	6	5	5	1	1	6	1	1	1	1	4	1	4	5	6	1	4	2	6	1	2	1	1	1	1	1	1	1	1	1	5	1	1	3	1	1	1	6	2	2	2	5
12	1	1	1	1	6	1	2	1	1	6	1	6	6	1	1	1	1	1	6	1	4	4	3	1	4	1	6	1	1	1	6	1	1	1	1	1	1	4	1	1	1	4	1	1	1	7
17	3	2	1	1	6	1	2	1	1	6	1	1	1	1	1	1	1	1	6	1	6	6	1	1	1	1	6	1	1	1	6	6	6	1	1	1	1	1	1	1	1	1	1	1	1	7
12	3	2	1	1	6	1	1	1	1	1	1	1	1	2	1	1	1	1	3	2	1	2	1	1	1	1	2	1	1	1	1	1	1	1	1	1	3	1	1	1	1	1	1	1	1	7
16	3	1	1	1	6	1	1	1	1	6	1	1	1	1	1	1	1	1	3	1	3	3	1	1	1	1	1	1	1	1	1	1	1	1	1	1	3	1	1	1	1	1	1	1	1	7
2	4	2	6	6	6	1	1	1	6	1	1	1	1	1	6	3	3	6	3	1	6	6	6	1	1	1	1	3	1	1	1	1	1	1	1	3	6	1	1	1	1	6	6	3	6	5
14	4	1	1	5	2	5	2	6	1	1	1	1	1	2	5	1	6	6	4	4	5	1	1	1	3	1	2	3	1	1	2	5	1	1	2	1	1	1	5	1	1	5	3	1	2	4
14	1	1	1	1	6	1	1	1	1	6	4	1	1	1	1	1	1	1	1	5	6	6	1	1	1	1	1	1	1	1	1	1	1	1	1	1	1	1	1	1	1	1	1	1	1	7
10	1	1	1	1	6	1	1	1	1	1	1	1	1	1	1	1	1	1	1	1	3	3	1	1	1	1	1	1	1	1	1	1	1	1	1	1	1	1	1	1	1	1	1	1	1	7
4	2	1	2	6	6	1	1	1	1	1	1	1	1	1	5	1	1	3	6	1	6	6	3	1	4	1	6	4	1	1	1	6	1	1	1	1	1	2	1	1	1	1	1	1	1	7
7	3	1	1	6	6	1	1	1	1	1	1	1	1	1	6	1	1	2	1	1	5	3	2	2	3	1	6	4	1	1	1	6	1	2	1	1	1	2	2	1	1	1	1	2	1	7
1	1	1	6	6	2	5	2	6	6	1	1	1	1	1	5	1	5	5	2	1	5	1	6	2	2	6	1	5	1	1	6	1	1	2	5	1	6	2	5	1	1	6	6	3	1	6
2	5	6	6	6	5	3	6	3	3	6	6	2	6	1	6	3	5	4	2	2	4	3	3	1	2	2	2	3	1	1	2	2	2	1	2	1	2	2	3	1	1	3	2	2	2	4
2	3	2	2	2	6	1	2	2	1	1	1	1	1	1	2	1	1	2	1	2	1	3	1	2	1	1	1	3	1	1	1	1	1	1	1	1	1	1	1	1	1	2	2	1	1	5
1	5	3	3	2	6	1	4	4	3	1	1	1	1	2	1	1	2	1	2	1	6	4	2	1	1	1	1	4	2	1	1	1	1	1	1	1	6	1	1	1	1	3	3	2	1	5
1	3	4	6	2	4	5	3	1	1	1	1	1	6	1	3	1	6	2	2	4	1	6	5	1	5	2	1	1	1	1	1	1	1	6	3	1	1	6	6	2	1	6	1	3	6	6
3	3	4	5	6	6	5	4	6	5	5	1	1	1	1	6	3	3	4	1	4	1	1	2	4	6	1	1	4	1	3	6	1	1	1	3	1	6	1	5	5	1	4	1	5	6	6
1	5	4	4	3	1	1	4	1	2	1	1	1	1	1	1	1	1	5	3	1	6	4	1	1	2	1	1	4	1	1	1	1	1	1	2	1	6	1	1	1	1	3	3	1	1	5
9	1	1	1	1	6	1	1	1	1	1	1	1	1	1	1	1	1	1	1	1	1	1	1	1	1	1	1	1	1	1	1	1	1	1	1	1	1	1	1	1	1	1	1	1	1	7
9	1	1	1	1	6	1	1	1	1	1	1	1	1	1	1	1	1	1	3	1	3	3	1	1	1	1	1	1	1	1	1	1	1	1	1	1	4	1	1	1	1	2	2	2	1	7
11	1	1	1	1	6	1	1	1	1	1	1	1	1	1	1	1	1	1	3	1	3	3	1	1	1	1	1	1	1	1	1	1	1	1	1	1	4	1	1	1	1	2	2	2	1	7
16	5	1	1	1	6	1	1	1	1	1	1	1	1	1	1	1	1	2	1	1	1	1	1	1	1	1	1	3	1	1	1	1	1	1	1	6	1	1	4	1	1	1	1	1	1	7
12	2	1	1	1	6	1	2	1	1	5	1	1	1	1	1	1	1	1	6	1	1	1	1	1	1	1	1	1	1	1	4	6	1	1	1	1	1	1	1	1	1	1	1	1	1	7
2	1	1	2	3	6	1	1	2	3	6	1	2	2	1	3	2	3	4	2	2	4	3	3	1	2	2	2	3	1	1	2	2	2	1	2	1	2	2	3	1	1	3	2	2	2	4
29	4	2	5	2	3	6	5	6	1	1	1	5	5	1	1	1	5	4	5	2	1	1	6	1	1	6	6	6	3	1	1	6	1	6	3	1	1	5	4	1	6	6	5	1	1	3
1	3	5	5	5	6	1	6	2	1	1	1	1	1	1	6	6	6	5	1	1	5	6	2	1	1	1	1	1	1	1	1	1	1	1	1	1	1	1	1	1	1	6	6	1	1	5
3	6	4	5	6	4	6	4	1	1	1	1	1	2	1	6	1	6	6	3	5	5	6	6	1	1	1	1	6	2	1	1	6	1	1	6	6	1	5	2	1	1	6	1	1	1	5
4	4	1	6	4	6	3	5	4	2	1	1	1	6	1	1	1	4	1	1	3	5	6	4	1	4	1	1	5	1	1	1	1	1	1	2	1	1	1	1	1	1	6	3	1	6	5
1	2	1	4	3	3	5	5	3	3	1	1	1	2	1	1	3	4	1	3	1	6	3	2	1	2	1	1	4	2	5	1	1	1	1	2	2	6	3	3	1	1	5	5	2	3	5
3	5	6	4	1	5	6	4	5	4	4	4	1	2	6	3	6	2	1	4	6	2	4	1	4	2	5	6	4	6	1	4	6	1	4	6	2	6	4	2	5	6	4	6	2	2	5
4	1	1	5	4	5	1	6	2	1	1	1	1	6	1	6	1	5	1	4	1	3	5	5	1	6	1	2	1	1	1	1	1	1	1	5	1	1	6	1	1	1	6	1	1	1	5
4	2	2	5	2	3	5	2	2	6	6	2	1	5	2	1	1	1	1	2	1	5	6	3	1	1	6	6	2	1	1	1	1	1	5	1	2	1	2	6	1	1	5	2	2	2	3
6	1	2	6	1	1	6	1	2	4	1	1	1	3	1	2	1	2	2	2	2	2	1	4	1	1	6	1	1	1	1	1	1	1	6	5	1	1	6	6	1	1	6	1	3	1	3
5	4	3	6	4	4	6	3	6	6	6	6	6	6	1	4	1	2	2	1	2	4	2	1	1	5	6	6	6	6	1	4	6	2	6	3	4	6	6	5	1	1	5	4	5	2	3
6	6	5	6	4	3	6	6	3	6	6	3	4	6	1	2	6	4	4	2	1	6	4	6	4	2	6	6	6	6	1	2	6	1	6	6	1	3	6	6	2	1	5	5	5	2	3
8	2	1	6	4	1	6	2	5	3	6	6	6	6	1	5	1	2	5	2	1	2	3	6	1	1	6	4	5	6	1	1	6	1	6	6	1	6	5	6	1	1	6	4	1	1	3
5	5	6	5	4	2	2	6	4	4	6	6	6	6	1	3	1	4	5	1	4	6	6	6	6	6	6	6	6	6	1	6	6	3	5	6	6	3	5	6	6	1	6	6	2	4	3
8	5	4	5	6	5	5	4	4	5	5	5	4	3	1	4	5	6	5	2	4	4	6	6	2	4	4	6	5	1	1	1	5	4	6	5	1	1	6	6	2	1	4	5	6	5	3
13	3	2	5	4	6	5	3	2	6	1	1	1	6	1	5	1	3	2	6	4	5	4	3	1	5	6	4	6	1	1	1	6	2	2	2	1	2	2	6	1	1	5	4	5	3	3
10	4	2	5	4	6	5	3	1	5	1	1	1	5	1	5	1	5	1	6	4	5	4	3	1	4	6	3	5	6	1	1	6	4	6	2	4	2	5	5	1	1	5	4	4	4	3
16	5	5	6	4	5	6	6	4	5	6	6	6	6	1	6	3	6	6	1	1	6	4	6	5	1	1	6	6	1	1	1	6	3	6	6	1	6	6	6	1	1	6	6	6	3	3
7	6	1	5	2	3	6	1	1	6	6	5	6	6	1	4	1	3	2	2	1	4	4	6	2	1	6	6	3	3	1	1	6	1	6	3	1	6	6	6	1	1	6	3	2	1	3
0	3	5	5	5	1	3	6	4	2	1	1	1	1	1	6	1	3	6	2	1	3	6	3	1	2	1	1	3	1	1	1	1	1	1	2	1	6	3	1	1	1	4	3	2	3	5
0	1	5	6	4	6	6	5	1	5	4	4	2	6	1	5	2	6	5	4	3	6	6	4	4	4	4	4	4	6	1	1	1	2	2	5	2	1	6	5	1	1	6	6	6	3	5
1	4	5	5	6	5	3	4	2	2	1	1	1	6	1	5	2	5	2	2	1	3	5	6	1	1	1	1	5	1	1	1	1	2	1	2	2	6	6	5	1	1	6	5	6	6	5
1	4	3	2	2	4	5	4	2	1	6	1	4	6	1	6	4	4	5	1	4	5	6	4	3	4	1	3	3	1	6	1	1	1	2	3	2	5	3	5	1	1	6	4	6	4	5
18	2	1	4	3	5	5	1	3	2	3	3	1	1	2	2	1	3	3	5	5	2	5	2	1	2	3	3	6	3	1	1	6	2	6	3	1	1	4	6	2	6	4	4	3	3	3
13	2	1	6	5	5	3	1	5	6	1	1	1	5	1	2	1	3	2	2	1	2	4	3	1	1	4	5	5	2	1	1	6	1	6	1	1	5	5	6	1	1	5	1	2	1	3
3	5	6	6	5	5	4	5	2	2	6	6	6	6	1	5	4	5	6	1	3	5	6	6	5	5	1	1	4	2	1	2	1	1	2	5	1	6	5	5	4	1	6	6	4	4	4
14	1	5	6	2	2	5	6	6	6	6	1	5	1	6	4	2	3	6	1	3	6	6	6	3	3	1	6	2	1	2	6	6	4	3	6	6	6	4	1	3	1	5	2	2	2	6
14	2	2	5	3	3	4	3	2	4	5	2	3	5	1	2	1	5	2	2	2	5	4	2	1	2	5	2	2	2	1	1	6	1	6	1	1	6	2	6	1	1	4	4	4	2	3
2	3	3	4	3	6	2	4	5	4	6	5	6	2	4	4	1	4	4	2	4	4	2	6	3	6	1	5	4	1	1	1	6	2	2	5	1	1	6	5	2	1	5	4	3	1	4
1	4	1	5	3	6	1	5	1	1	1	1	1	5	1	6	1	5	5	2	1	5	6	3	1	1	1	1	2	1	1	1	1	3	1	1	1	6	1	1	1	1	2	3	1	2	5
1	3	1	3	1	1	1	1	2	1	1	1	1	1	1	4	1	2	4	2	1	1	3	1	1	2	1	1	2	1	1	1	1	1	1	1	3	1	1	2	1	1	3	3	1	2	5
9	1	1	1	2	6	1	1	1	1	1	1	1	1	2	1	1	1	1	3	1	3	2	1	1	1	1	1	2	1	1	1	1	1	1	1	1	1	1	1	1	1	1	1	1	1	7
7	2	2	2	2	5	1	1	1	1	2	1	1	1	2	2	1	1	1	3	1	3	2	1	2	1	2	1	2	1	1	1	1	2	1	1	1	1	1	1	1	1	1	1	1	1	7
8	1	3	1	2	6	1	1	6	1	1	5	1	1	1	1	5	1	6	1	1	6	1	1	1	2	1	1	1	4	1	1	1	1	1	1	1	2	1	6	1	1	2	1	1	1	4
1	4	3	5	4	2	6	5	3	2	6	5	4	4	1	5	3	5	5	3	4	5	5	6	3	2	1	2	6	1	6	1	1	1	1	2	5	6	4	6	4	1	6	6	4	2	4
4	1	1	3	3	6	6	1	3	6	6	2	6	6	1	6	1	3	5	1	3	6	6	6	1	1	6	1	1	1	1	1	1	3	1	6	6	6	6	6	1	1	6	1	5	6	4
2	1	1	1	1	6	1	1	1	1	1	1	1	1	1	6	1	1	6	6	1	3	1	1	1	3	1	1	1	1	1	6	1	1	1	1	1	1	1	1	1	1	1	1	1	1	4
4	1	1	1	5	1	2	2	1	1	1	1	1	1	1	2	1	1	3	1	2	6	1	1	1	1	6	1	6	1	1	1	2	4	1	1	1	1	1	1	1	1	3	2	2	2	4
